# Supplementary material for: High-titer manufacturing of SARS-CoV-2 Spike-pseudotyped VSV in stirred-tank bioreactors
Source: PubMed Central journal article supplement — Mol Ther Methods Clin Dev. 2024 Jan 17;32(1):101189. doi: 10.1016/j.omtm.2024.101189 (PMC10847022; doi:10.1016/j.omtm.2024.101189), 2024-01-17
Supplement: mmc1.pdf [file mmc1.pdf]

**OMTM, Volume 32**

**Supplemental information**

**High-titer manufacturing of SARS-CoV-2**

**Spike-pseudotyped VSV in stirred-tank bioreactors**

**Hayley M. Todesco, Chris Gafuik, Cini M. John, Erin L. Roberts, Breanna S. Borys, Alexis Pawluk, Michael S. Kallos, Kyle G. Potts, and Douglas J. Mahoney**

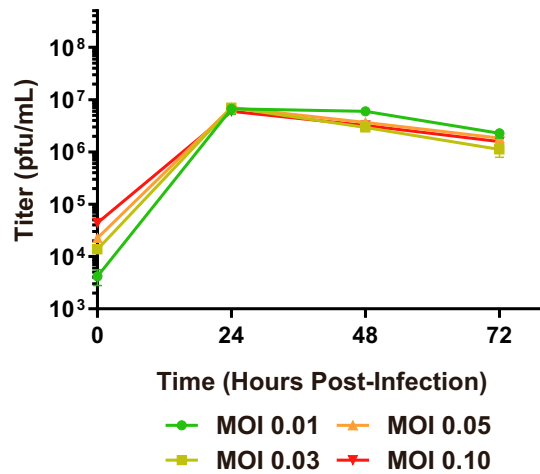

**Figure S1: Growth curves of VSV-ΔG-S<sub>CTΔ21</sub> in tissue-culture plates.** 145 cm<sup>2</sup> tissue culture plates were infected at indicated MOIs (pfu/cell) with VSV-ΔG-S<sub>CTΔ21</sub>. Cultures were harvested at the indicated times and titered on Vero cells. Mean ± SD is shown (n=2).

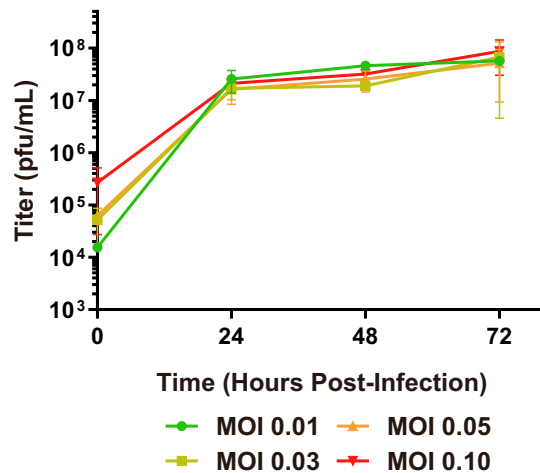

**Figure S2: Growth curves with VSV-ΔG-S<sub>CTΔ21</sub> in 125 mL bioreactors.** Cultures were infected at indicated MOIs (pfu/cell) with VSV-ΔG-S<sub>CTΔ21</sub>. Cultures were harvested at the indicated times and titered on Vero cells. Mean ± SD is shown, n=2.

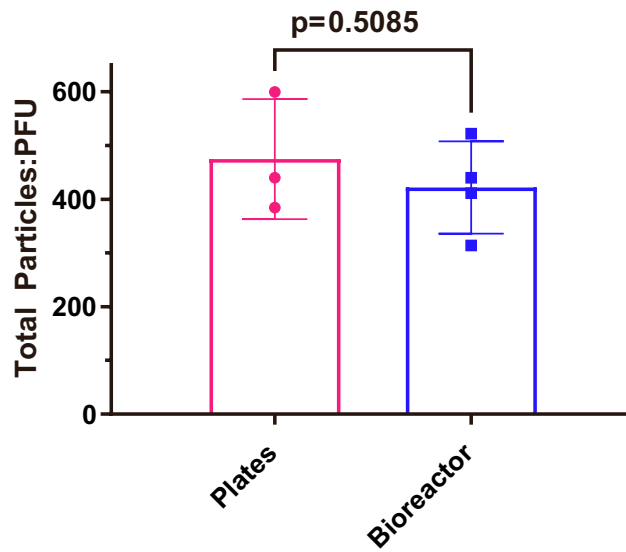

**Figure S3: Particle to pfu ratio of VSV- $\Delta$ G-S<sub>CT</sub> $\Delta$ <sub>21</sub> as measured by Tunable Resistive Pulse Sensing (TRPS).** Virus was produced in 145 cm<sup>2</sup> tissue culture plates or 125 mL Celstir bioreactors as described in Materials and Methods. Mean  $\pm$  SD is shown and two-tailed t-test was used, n=3-4.

VSV-ΔM51-G-S<sub>CTA21</sub>-GFP

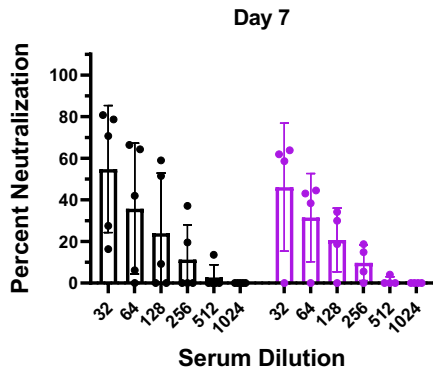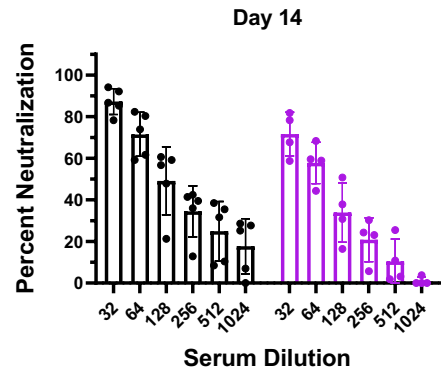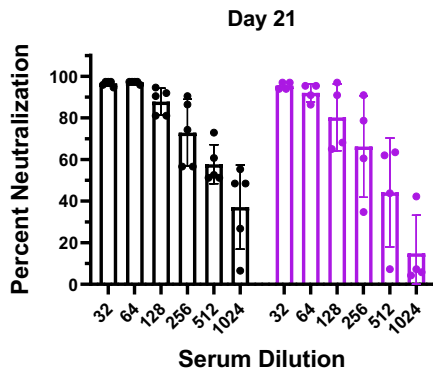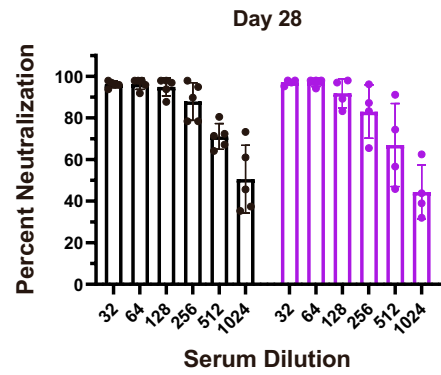

VSV-ΔG-S<sub>Omicron</sub>-CTA21-GFP

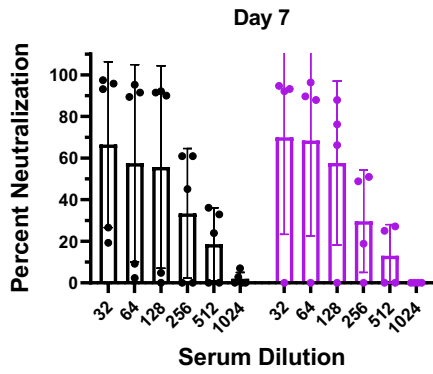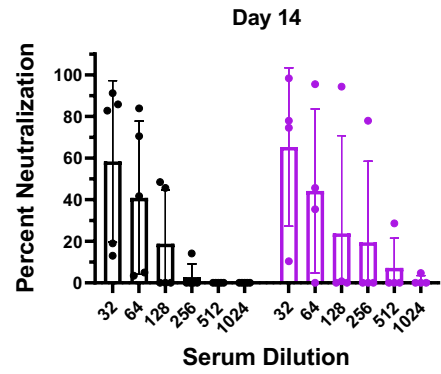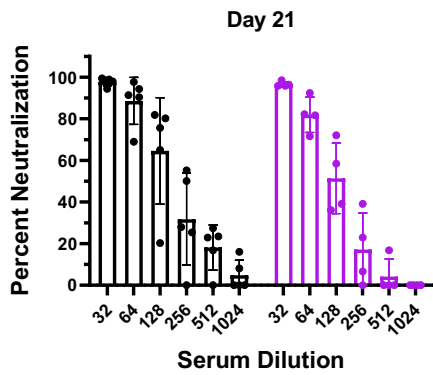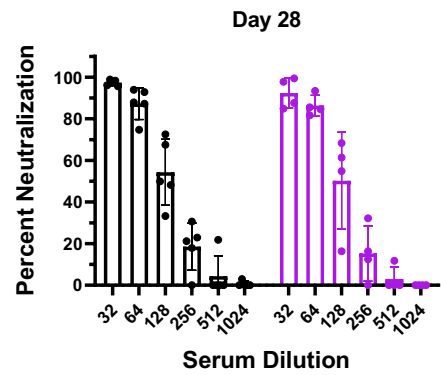

● Plates ● Bioreactor

**Figure S4: Neutralization against ancestral SARS-CoV-2 pseudovirus measured in serum harvested from hamsters.** Hamsters were vaccinated with a single intranasal (IN) injection of  $1 \times 10^3$  pfu VSV- $\Delta$ G-S<sub>CT $\Delta$ 21</sub> of plate- or bioreactor-based virus. Serum neutralizing antibody titers were monitored over 28 days by pseudovirus PRNT assay using either VSV- $\Delta$ M51- $\Delta$ G-S<sub>CT $\Delta$ 21</sub>-GFP or VSV- $\Delta$ G-S<sub>Omicron-CT $\Delta$ 21</sub>-GFP *in vitro*. Mean  $\pm$  SD is shown, n=4.

**Table S1: Comparison of plate-based and bioreactor-based Vero growth and VSV-ΔG-S<sub>CTΔ21</sub> and VSV-ΔG-S<sub>Omicron-CTΔ21</sub>-GFP production.** \*Determined using the peak virus titers in the culture medium at 24 or 48 hpi for plates and 72 hpi for both bioreactor sizes. \*\*n=1 for 1 L.

|                                                                                                                    | 1 145 cm <sup>2</sup><br>Plate   | 125 mL<br>Bioreactor            | 1 L Bioreactor                  |
|--------------------------------------------------------------------------------------------------------------------|----------------------------------|---------------------------------|---------------------------------|
| Available growth area (cm <sup>2</sup> )                                                                           | 145                              | 2 200                           | 26 400                          |
| Mean cells per cm <sup>2</sup>                                                                                     | 1.00 ± 0. 64<br>×10 <sup>5</sup> | 2.98 ± 0.47<br>×10 <sup>5</sup> | 1.49 ± 0.16<br>×10 <sup>5</sup> |
| Mean total cells grown                                                                                             | 1.45 ± 0.93<br>×10 <sup>7</sup>  | 6.55 ± 1.02<br>×10 <sup>8</sup> | 3.95 ± 0.42<br>×10 <sup>9</sup> |
| Mean peak* virus yield for VSV-ΔG-S <sub>CTΔ21</sub><br>(pfu/mL)                                                   | 7.02 ± 0.05<br>×10 <sup>6</sup>  | 5.88 ± 2.59<br>×10 <sup>7</sup> | 2.05 ± 0.58<br>×10 <sup>8</sup> |
| Mean peak* cell-specific virus yield for<br>VSV-ΔG-S <sub>CTΔ21</sub> (pfu/cell)                                   | 9.68 ± 4.46                      | 8.57 ± 2.60                     | 45.77 ± 12.2                    |
| Mean peak* virus yield for VSV-ΔG-<br>S <sub>Omicron-CTΔ21</sub> (pfu/mL)                                          | 1.09 ± 0.02<br>×10 <sup>6</sup>  | 5.58 ± 0.35<br>×10 <sup>6</sup> | 5.50 ×10 <sup>6**</sup>         |
| Mean peak* cell-specific virus yield for<br>VSV-ΔG-S <sub>Omicron-CTΔ21</sub> (pfu/cell)                           | 3.70 ± 0.07                      | 1.12 ± 0.06                     | 1.82**                          |
| Number of plates/runs that would produce<br>an equivalent number of mean total cells                               | 272 plates                       | 6 runs                          | 1 run                           |
| Number of plates/runs that would produce<br>an equivalent number of mean total pfu of<br>VSV-ΔG-S <sub>CTΔ21</sub> | 1284 plates                      | 32 runs                         | 1 run                           |

**Table S2: Cost considerations for plate-based and bioreactor-based Vero growth and VSV- $\Delta$ G-S<sub>CT $\Delta$ 21</sub> production.**

|                            | 1 145 cm <sup>2</sup><br>Plate | 125 mL<br>Bioreactor | 1 L Bioreactor          |
|----------------------------|--------------------------------|----------------------|-------------------------|
| Fixed costs (USD)          | \$20.12                        | \$31.70              | \$54.63                 |
| Variable costs (USD)       | \$31.62                        | \$143.83             | \$965.36                |
| Cost per million pfu (USD) | \$0.37 $\pm$ \$0.00            | \$0.03 $\pm$ \$0.02  | <\$0.01 $\pm$<br>\$0.00 |
